# Supplementary material for: Layer-by-layer self-assembly of 2D graphene nanosheets, 3D copper oxide nanoflowers and 0D gold nanoparticles for ultrasensitive electrochemical detection of alpha fetoprotein
Source: Royal Society of Chemistry journal article supplement (doi:10.1039/c5ra07547e), 2015-01-01
Supplement: c5ra07547e1.pdf [file c5ra07547e1.pdf]

**Layer-by-layer self-assembly of 2D graphene nanosheets, 3D copper oxide nanoflowers and 0D gold nanoparticles for ultrasensitive electrochemical detection of alpha fetoprotein**

Yulan Wang, Dan Wu, Yong Zhang, Xiang Ren, Yaoguang Wang, Hongmin Ma\* and Qin Wei

*Key Laboratory of Chemical Sensing & Analysis in Universities of Shandong,  
School of Chemistry and Chemical Engineering, University of Jinan, Jinan  
250022, P.R. China.*

**Corresponding author**

Dr. Hongmin Ma

Tel: 86-531-82765730

Fax: 86-531-82765969

E-mail address: [mahongmin2002@126.com](mailto:mahongmin2002@126.com)

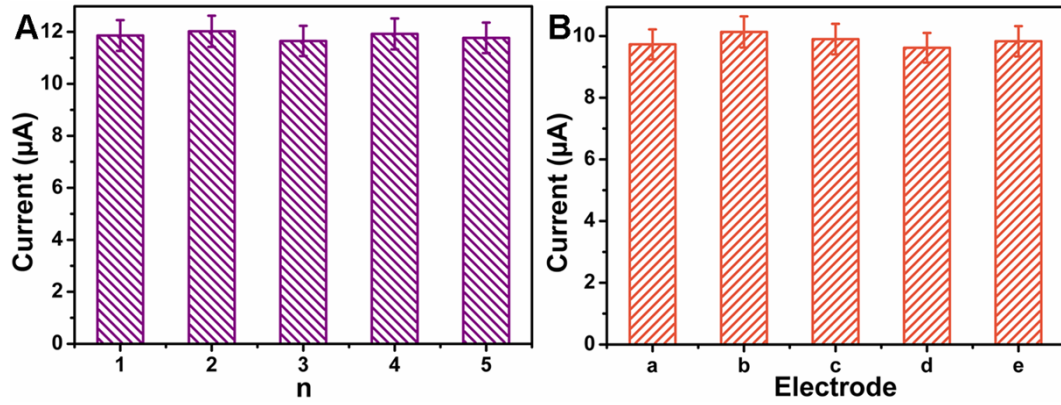

**Fig. S1.** (A) Electrocatalytic current responses of the immunosensor fabricated on five different electrodes for the detection of 0.1 pg/mL AFP; (B) Electrocatalytic current responses of the immunosensor for the detection of 1 pg/mL AFP +100 pg/mL AA (a), 1 pg/mL AFP +100 pg/mL CEA (b), 1 pg/mL AFP +100 pg/mL IgG (c), 1 ng/mL AFP +100 pg/mL BSA (d), 1 pg/mL AFP (e). Error bar = RSD (n = 5).
